# Supplementary material for: Automatic segmentation and volumetry of multiple sclerosis brain lesions from MR images
Source: PubMed Central journal article supplement (PMC4474324; doi:10.1016/j.nicl.2015.05.003), 2015-05-16
Supplement: mmc1.pdf [file mmc1.pdf]

## 7 Supplementary material

### Table of contents

|                                                              |           |
|--------------------------------------------------------------|-----------|
| <u>BEST CASE FOR LST ON ACCURACY .....</u>                   | <u>29</u> |
| <u>WORST CASE FOR LST AND LESION-TOADS ON ACCURACY .....</u> | <u>30</u> |
| <u>BEST CASE FOR LST ON REPRODUCIBILITY .....</u>            | <u>31</u> |
| <u>BEST CASE FOR LESION-TOADS ON REPRODUCIBILITY .....</u>   | <u>32</u> |
| <u>WORST CASE FOR LST ON REPRODUCIBILITY .....</u>           | <u>33</u> |
| <u>WORST CASE FOR LESION-TOADS ON REPRODUCIBILITY .....</u>  | <u>34</u> |

This supplementary material provides additional information and supporting figures regarding the accuracy and reproducibility for all methods.

#### **7.1 Best case for LST on accuracy**

Figure S.1 shows the best case for LST (Dice: 0.80, sensitivity: 0.80 and precision: 0.79). This case has Dice: 0.82, sensitivity: 0.76, precision: 0.90 for MSmetrix and Dice: 0.70, sensitivity: 0.54, precision: 0.98 for Lesion-TOADS. The higher sensitivity of LST compared to the other two methods is caused by the detection and segmentation of subtle lesions (marked by a pink arrow

head); however, the lower precision of LST suggests that it introduced false lesions and it overestimated the lesion boundary (see region marked by cyan arrow heads). MSmetrix has higher Dice similarity index than LST due to lower number of false positive lesion voxels.

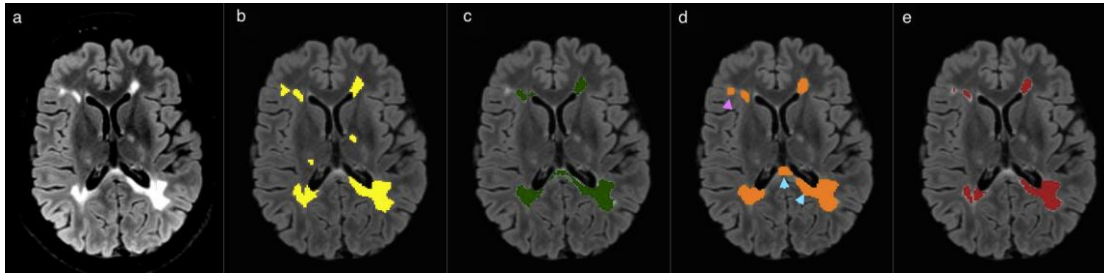

Figure S.1: Original FLAIR image (a) followed by bias corrected FLAIR image and superimposed lesion segmentation from: (b) expert segmentation, (c) MSmetrix, (d) LST, (e) Lesion-TOADS. Cyan arrow heads show false positive lesions and overestimation of the lesion boundaries in LST. Pink arrow head show lesions picked by LST but not by the other methods except partially one in Lesion-TOADS.

## 7.2 Worst case for LST and Lesion-TOADS on accuracy

Figure S.2 shows the worst case for LST (Dice: 0.31, sensitivity: 0.21 and precision: 0.58), which is also the worst case for Lesion-TOADS (Dice: 0.44, sensitivity: 0.38 and precision: 0.52). Here, MSmetrix has a better Dice similarity index, sensitivity and precision compared to the other two methods (Dice: 0.52, sensitivity: 0.40, precision: 0.76). The low sensitivity and precision of LST are due to the fact that it did not find the big lesion, indicated by the purple arrow head in (d). On the other hand, for MSmetrix and Lesion-TOADS, low sensitivity is due to missing subtle lesions and/or underestimation of lesion boundary (purple arrow head). Lesion-TOADS has a lower precision compared to MSmetrix because it finds a lot of false positive lesions (cyan arrow head).

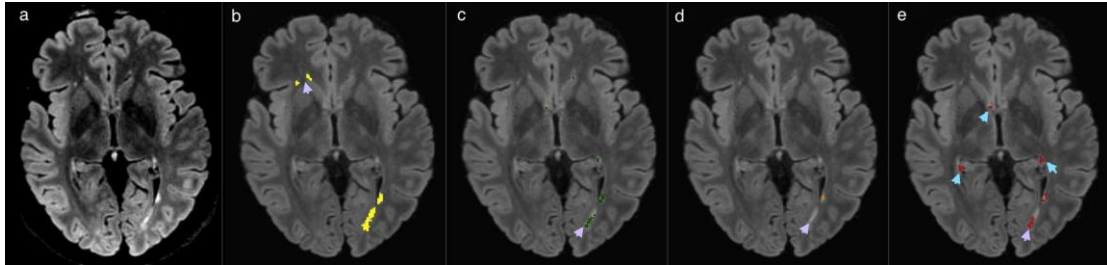

Figure S.2: Original FLAIR image (a) followed by bias corrected FLAIR image and superimposed lesion segmentation from: (b) expert segmentation, (c) MSmetrix, (d) LST, (e) Lesion-TOADS. Cyan arrow heads show false positive lesions in Lesion-TOADS. Purple arrow heads show missed subtle lesions and underestimation of lesion boundary.

### 7.3 Best case for LST on reproducibility

Figure S.3 shows the best case for LST (Dice: 0.84). In this case, MSmetrix has a similar Dice of 0.83 followed by Lesion-TOADS (Dice: 0.78). A lower Dice similarity index for Lesion-TOADS is mainly due to the inconsistent estimation of lesion boundaries (marked by cyan arrow heads) compared to MSmetrix and LST, which are more consistent in the lesion segmentation in both scans. However, on the other hand, Lesion-TOADS misses big lesions (marked by cyan arrow heads) whereas MSmetrix and LST detect them successfully.

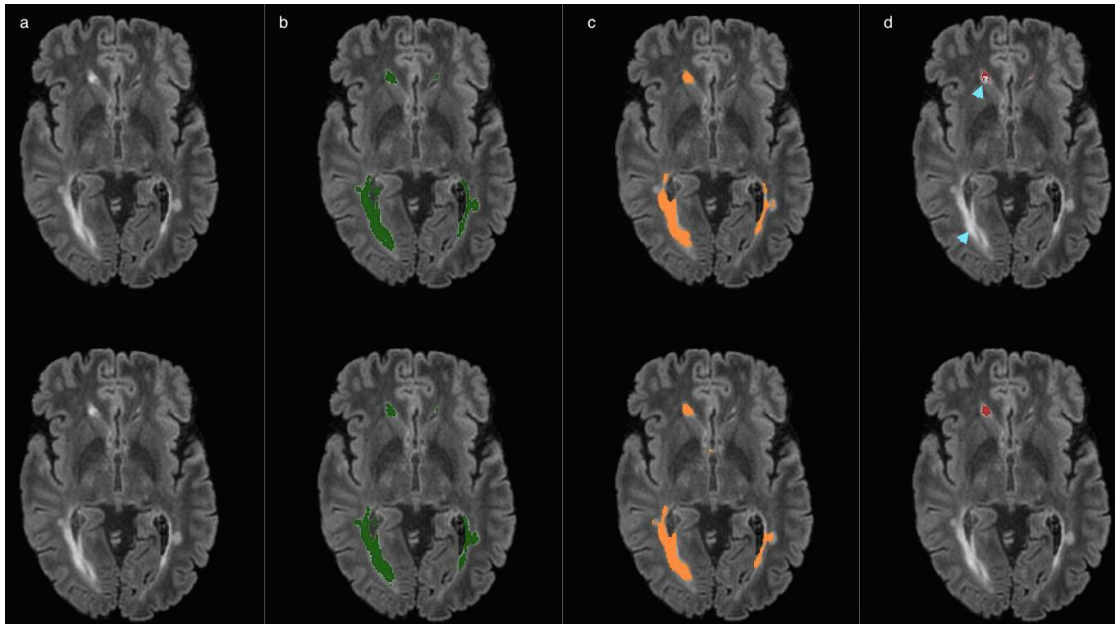

Figure S.3: Bias corrected FLAIR image (a) and super-imposed lesion segmentation from: (b) MSmetrix, (c) LST, (d) Lesion-TOADS. The first row corresponds to the lesion segmentation of scan 1 and the second row corresponds to the lesion segmentation of scan 2. Cyan arrow heads show missed lesions and difference in the lesion segmentation boundary between scan 1 and scan 2 for Lesion-TOADS.

#### 7.4 Best case for Lesion-TOADS on reproducibility

Figure S.4 shows the best case for Lesion-TOADS (Dice: 0.82). In this case, LST and MSmetrix have comparable Dice of 0.79 and 0.77, respectively. The higher Dice similarity index for Lesion-TOADS compared to MSmetrix and LST is mainly due to its quite consistent performance in estimation of lesion boundaries in scan 1 and scan 2 for this case. A lower Dice similarity index for both MSmetrix and LST accounts for (probably) several false lesions in either of the scans (marked by cyan arrow heads).

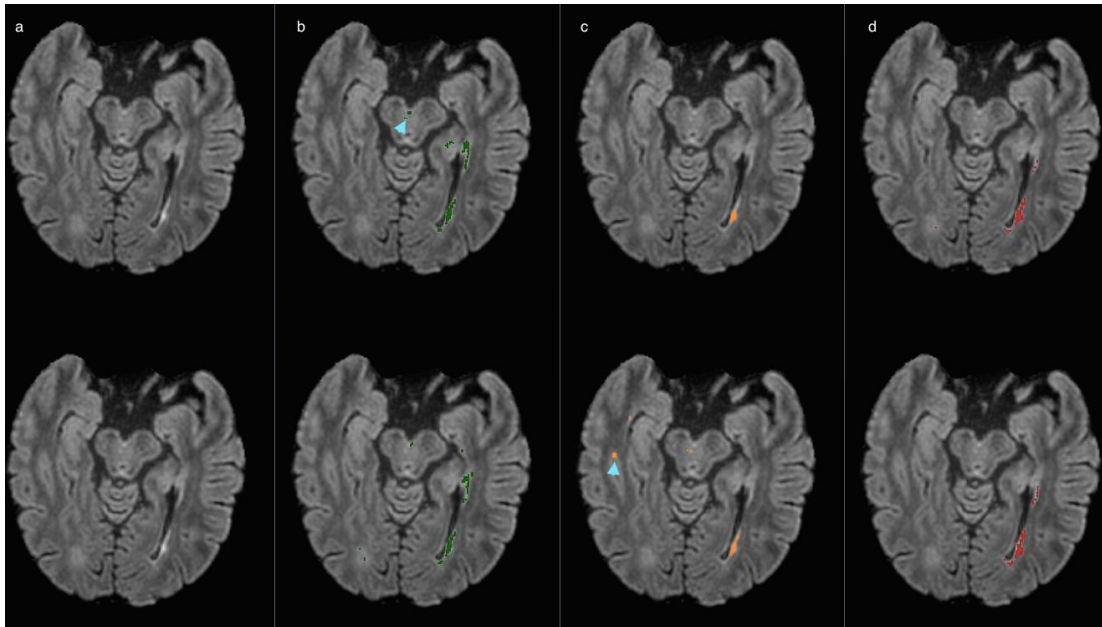

Figure S.4: Bias corrected FLAIR image (a) and super-imposed lesion segmentation from: (b) MSmetrix, (c) LST, (d) Lesion-TOADS. The first row corresponds to the lesion segmentation of scan 1 and the second row corresponds to the lesion segmentation of scan 2. Cyan arrow heads represent false lesion detection for MSmetrix and LST.

## 7.5 Worst case for LST on reproducibility

Figure S.5 shows the worst case for LST (Dice: 0). In this case, MSmetrix and Lesion-TOADS have comparable Dice of 0.38 and 0.35, respectively. Before we explain the results, its important to mention here that this subject has very few lesions. A zero Dice similarity index for LST is primarily due to the fact that it is unable to find any lesions in scan 1, but it finds some lesions in scan 2. Both MSmetrix and Lesion-TOADS consistently find both true lesions (pink arrow head) and false lesions (cyan arrow head) across the scans. However, the lower Dice similarity index for Lesion-TOADS accounts for slightly more false lesion detection in either of the scans compared to MSmetrix.

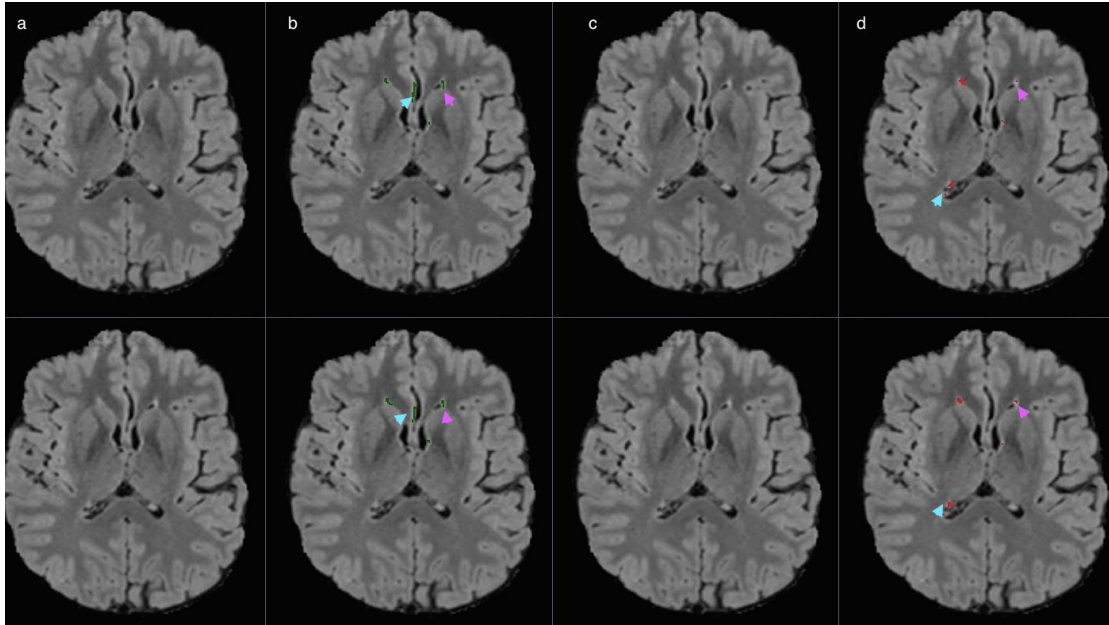

Figure S.5: Bias corrected FLAIR image (a) and super-imposed lesion segmentation from: (b) MSmetrix, (c) LST, (d) Lesion-TOADS. The first row corresponds to the lesion segmentation of scan 1 and the second row corresponds to the lesion segmentation of scan 2. Cyan arrow heads show false lesions detection for MSmetrix and Lesion-TOADS. Pink arrow heads show subtle lesions that are picked up by MSmetrix and Lesion-TOADS.

## 7.6 Worst case for Lesion-TOADS on reproducibility

Figure S.6 shows the worst case for Lesion-TOADS (Dice: 0.15). In this case, LST has the best performance (Dice: 0.63) followed by MSmetrix (Dice: 0.40). The lower Dice similarity index for Lesion-TOADS is primarily due to the fact that quite some non-overlapping lesions are found, which are probably false positives (cyan ellipse). For LST, the higher Dice similarity index is mainly because it consistently finds lesions across the scans. A low Dice similarity index for MSmetrix is mainly due to some false lesion detection in either of the scans (marked by cyan arrow heads). Although the Dice similarity index is higher for LST compared to MSmetrix, LST is slightly imprecise in lesion boundary estimation (marked by cyan arrow heads) for this case.

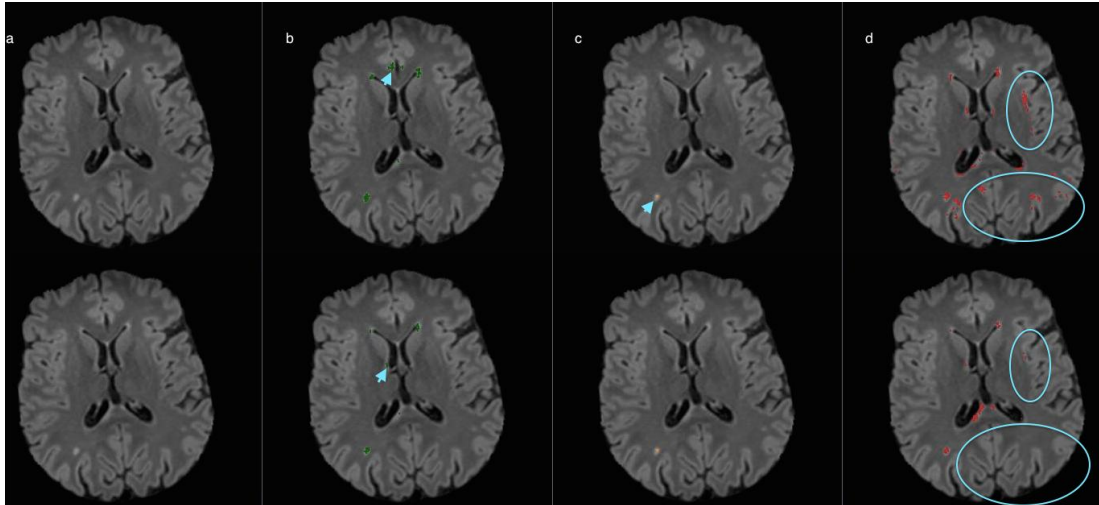

Figure S.6: Bias corrected FLAIR image (a) and super-imposed lesion segmentation from: (b) *MSmetrix*, (c) *LST*, (d) *Lesion-TOADS*. The first row corresponds to the lesion segmentation of scan 1 and the second row corresponds to the lesion segmentation of scan 2. Cyan ellipses represent the non-overlapping lesions between scan 1 and scan 2 for *Lesion-TOADS*, which are probably false positives. Cyan arrow heads show false lesion detection by *MSmetrix* and imprecise lesion boundary estimation by *LST* in both scans.
